1 Advantages of genotype imputation with ethnically matched reference panel  
2 for rare variant association analyses

3 Mart Kals<sup>1,2\*</sup>, Tiit Nikopensius<sup>1</sup>, Kristi Läll<sup>1,3</sup>, Kalle Pärn<sup>2</sup>, Timo Tõnis Sikka<sup>1,4</sup>,  
4 Jaana Suvisaari<sup>5</sup>, Veikko Salomaa<sup>5</sup>, Samuli Ripatti<sup>2,6</sup>, Aarno Palotie<sup>2,6</sup>, Andres Metspalu<sup>1</sup>,  
5 Tõnu Esko<sup>1,6</sup>, Priit Palta<sup>1,2¶</sup>, Reedik Mägi<sup>1¶</sup>

6  
7 <sup>1</sup> Estonian Genome Center, Institute of Genomics, University of Tartu, Tartu, Estonia

8 <sup>2</sup> Institute for Molecular Medicine Finland (FIMM), University of Helsinki, Helsinki, Finland

9 <sup>3</sup> Institute of Mathematics and Statistics, University of Tartu, Tartu, Estonia

10 <sup>4</sup> Department of Biotechnology, Institute of Molecular and Cell Biology, University of Tartu, Tartu,  
11 Estonia

12 <sup>5</sup> National Institute for Health and Welfare, Helsinki, Finland

13 <sup>6</sup> Broad Institute of MIT and Harvard, Cambridge, Massachusetts, USA

14

15 \* Corresponding author

16 E-mail: mart.kals@ut.ee (MK)

17

18 ¶ These authors jointly supervised this work

## 19 **Abstract**

20 Genotype imputation has become a standard technique prior genome-wide association studies  
21 (GWASs). For common and low-frequency variants, genotype imputation can be performed  
22 sufficiently accurately with publicly available and ethnically heterogeneous imputation reference  
23 panels like 1000 Genomes Project (1000G) and Haplotype Reference Consortium. However, the  
24 imputation of rare variants has been shown to be significantly more accurate when ethnically matched  
25 reference panel is used. Even more, greater genetic similarity between reference panel and target  
26 samples facilitates the detection of rare (or even population-specific) causal variants. Notwithstanding,  
27 the genome-wide downstream consequences and differences of using ethnically mixed and matched  
28 reference panels have not been yet comprehensively explored.

29 We determined and quantified these differences by performing several comparative evaluations of the  
30 discovery-driven analysis scenarios. A variant-wise GWAS was performed on seven complex diseases  
31 and body mass index by using genome-wide genotype data of ~37,000 Estonians imputed with  
32 ethnically mixed 1000G and ethnically matched imputation reference panels. Although several  
33 previously reported common (minor allele frequency;  $MAF > 5\%$ ) variant associations were replicated  
34 in both imputed datasets, no major differences were observed among the genome-wide significant  
35 findings or in the fine-mapping effort. In the analysis of rare ( $MAF < 1\%$ ) coding variants, 46  
36 significantly associated genes were identified in the ethnically matched imputed data as compared to  
37 four genes in the 1000G panel based imputed data. All resulting genes were consequently studied in  
38 the UK Biobank data.

39 These associated genes provide an example of how rare variants can be efficiently analysed to  
40 discover novel, potentially functional genetic variants in relevant phenotypes. Furthermore, our work  
41 serves as proof of a cost-efficient study design, demonstrating that the usage of ethnically matched  
42 imputation reference panels can enable improved imputation of rare variants, facilitating novel high-  
43 confidence findings in rare variant GWAS scans.

## 44 **Author summary**

45 Over the last decade, genome-wide association studies (GWASs) have been widely used for detecting  
46 genetic biomarkers in a wide range of traits. Typically, GWASs are carried out using chip-based  
47 genotyping data, which are then combined with a more densely genotyped reference panel to infer  
48 untyped genetic variants in chip-typed individuals. The latter method is called imputation and its  
49 accuracy depends on multiple factors. Publicly available and ethnically heterogeneous imputation  
50 reference panels (IRPs) such as 1000 Genomes Project (1000G) are sufficiently accurate for imputation  
51 of common and low-frequency variants, but custom ethnically matched IRPs outperform these in case  
52 of rare variants. In this work, we systematically compare downstream association analysis effects on  
53 eight complex traits in ~37,000 Estonians imputed with ethnically mixed and ethnically matched IRPs.  
54 We do not observe major differences in the single variant analysis, where both imputed datasets  
55 replicate previously reported significant loci. But in the gene-based analysis of rare protein-coding  
56 variants we show that ethnically matched panel clearly outperforms 1000G panel based imputation,  
57 providing 10-fold increase in significant gene-trait associations. Our study demonstrates empirically  
58 that imputed data based on ethnically matched panel is very promising for rare variant analysis – it  
59 captures more population-specific variants and makes it possible to efficiently identify novel findings.

## 60 **Introduction**

61 Genome-wide association studies (GWASs) have been successfully implemented to capture genetic  
62 variants with small to modest effect sizes and have identified thousands of common variants robustly  
63 associated with different complex traits and diseases [1]. However, even in aggregate, these explain  
64 only a small fraction of the heritability of studied diseases.

65 The sample size of a GWAS can be increased through relatively cheap chip-based genotyping and  
66 subsequent genotype imputation. Imputation is a commonly used computational method for lending  
67 information from a densely genotyped reference panel of phased haplotypes, allowing to study  
68 variants that have not been directly genotyped in target samples and thereby this approach not only  
69 increases the power but also the resolution of GWAS [2–4]. Genotype imputation can also facilitate

70 better fine-mapping association signals through the increase of genetic variant density in candidate  
71 genomic regions [5].

72 Publicly accessible imputation reference panels like 1000 Genomes Project (1000G) [6] and  
73 Haplotype Reference Consortium (HRC) [7] have been frequently used for imputation in advance to  
74 GWAS. Nevertheless, both of these ethnically heterogeneous reference panels have only limited  
75 capacity to provide complete and accurate imputation of rare (minor allele frequency; MAF < 1%)  
76 variants [8], suggested to contribute to the missing heritability [9]. During the last few years it has  
77 been shown that using an ethnically matched reference panel can greatly improve the ‘completeness’  
78 and accuracy of genotype imputation [10–15], resulting in higher imputation accuracy compared to the  
79 1000G panel even in case of smaller panel size [16,17]. In addition, several recent studies have  
80 demonstrated the utility of ethnically matched datasets for the discovery of disease or trait-associated  
81 rare variants [18–25].

82 Imputed datasets based on ethnically matched reference panels are considered to be powerful tools to  
83 discover previously unidentified rare variants. However, the typical approaches for testing associations  
84 of genetic variants with phenotypes based on simple regression models, and are underpowered for rare  
85 variants in most studies due to their low frequencies and large numbers [26]. To overcome these  
86 issues, different methods have been proposed to increase statistical power in rare variant association  
87 studies, typically by combining information across multiple rare variants within a specific genomic  
88 region or functional unit (e.g. gene) [27–29]. Often these methods focus on certain categories of  
89 variation (e.g. missense or loss-of-function (LoF) variants) [30], and have been applied successfully in  
90 several studies [31–33]. Therefore, gene-based tests allow to capture the joint contribution of multiple  
91 rare variants, improve power and enable to identify novel disease associated genes encompassing  
92 putatively functional variants [34–37].

93 In the current study, we impute 51,886 chip-typed Estonians with both ethnically matched Estonian-  
94 Finnish (EstFin) and ethnically mixed 1000G imputation reference panels (IRPs) to determine and  
95 quantify the differences in analysis results of eight complex traits. In particular, we evaluate two  
96 analysis scenarios: 1) a variant-wise GWAS; 2) a gene-wise analysis to determine the joint

97 contribution of rare (MAF < 1%) nonsynonymous (NS) and LoF variants which we validate in the UK  
98 Biobank data.

## 99 Results

100 First, we developed a high-coverage (~30×) whole genome sequencing (WGS) based imputation  
101 reference panel comprising of ethnically closely related 2,279 Estonians and 1,856 Finns, resulting in  
102 8,270 haplotypes in the EstFin IRP. Secondly, we imputed 51,886 chip-genotyped Estonians with the  
103 EstFin and 1000G IRPs (S1 Appendix, S1 Table, S1 and S2 Figs). The EstFin IRP provided 13.86  
104 million (M) and the 1000G IRP 9.06 M confidently imputed variants (imputation INFO-value > 0.8)  
105 with MAF > 0.05% in 36,716 unrelated individuals, which were further used to carry out a  
106 comparative GWAS and gene-wise association testing of rare variants with eight complex traits.  
107 Finally, the identified significant gene-trait associations were studied in the UK Biobank data (Fig 1).

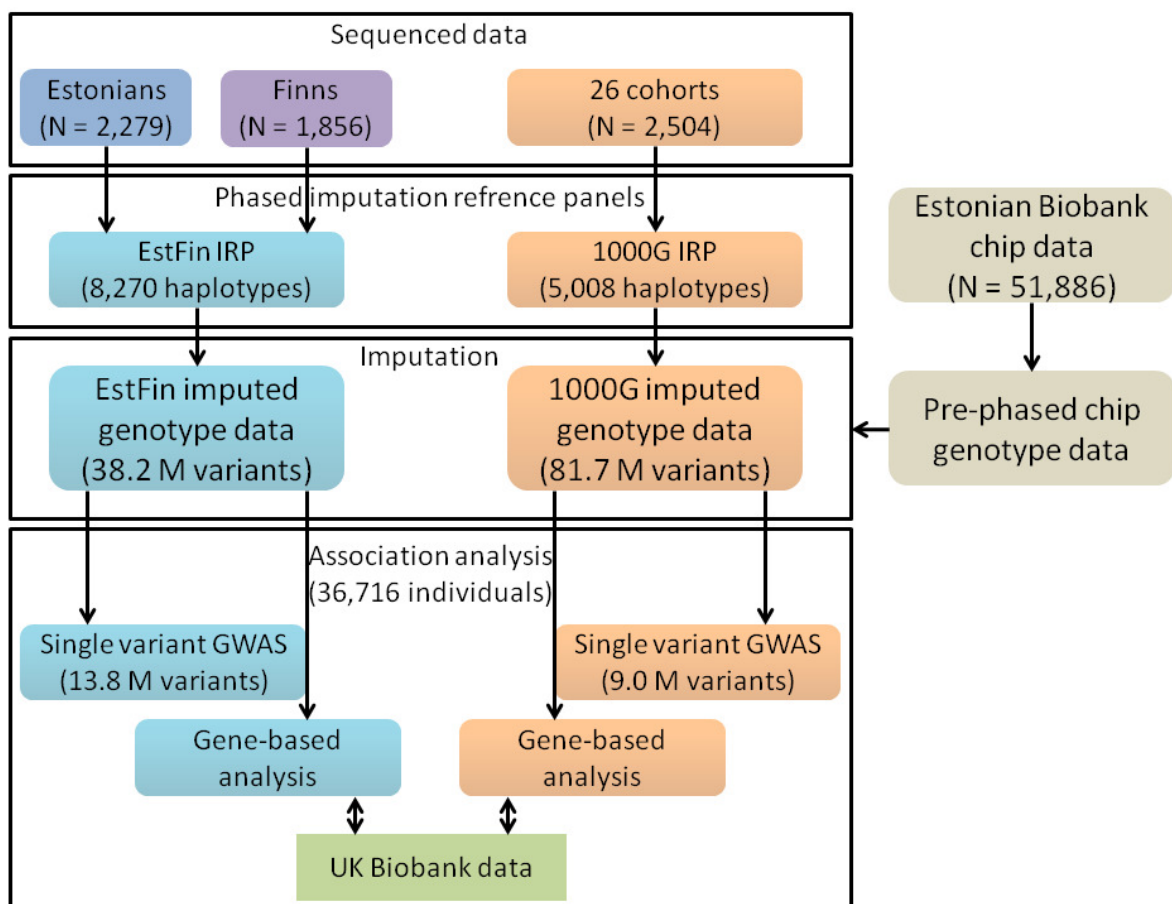

**Fig 1. Schematic overview of imputation reference panels and downstream association analysis.** This scheme gives an overview of used imputation reference panels, chip-based and imputed genotype datasets, and comparative association analyses, where gene-based results were validated in the UK Biobank data.

## 108 **Single variant analysis**

109 We analyzed the associations between imputed variants and eight complex traits: body mass index and  
110 seven complex diseases of major public health importance [38] – bipolar disorder (BD), coronary  
111 artery disease (CAD), Crohn's disease (CD), hypertension (HT), rheumatoid arthritis (RA), type 1  
112 diabetes (T1D), and type 2 diabetes (T2D) (S2 Table). Analyses were conducted separately in both  
113 imputed datasets. Results of variant-wise GWA studies are summarized in Table 1 and S3 Fig. We  
114 detected 12 and 13 genome-wide significant ( $P < 6.25 \times 10^{-9}$ ) loci based on EstFin and 1000G IRPs,  
115 respectively. In both datasets we discovered eleven identical loci and three IRP-specific associations,  
116 all of which have been previously reported [1] (S3 Table). Autoimmune diseases RA and T1D  
117 demonstrated common variant associations in the HLA-region, BMI and T2D revealed long  
118 established association with *FTO* gene (Fig 2). Although lead variants did not overlap (except  
119 rs11102694 and rs9273363 with T1D), top hits from both datasets were in close proximity and in high  
120 linkage disequilibrium (S4 Table and S4 Fig).

121 IRP-specific associations included *BCL2L15* association with T1D in case of the EstFin panel based  
122 imputation, whereas an intergenic locus at chromosome 6p12.3 was associated with BMI and *TLE1*  
123 locus with T2D in the 1000G-based imputed data only, although the lowest *P* values of another IRP-  
124 based imputed data were close to the genome-wide significance level (S4 Table and S3 Fig).

**Table 1. Significant loci detected by single variant association analysis with complex traits.** Confidently imputed variants (INFO > 0.8) are tested for associations with complex traits (BMI – body mass index, CAD – coronary artery disease, RA – rheumatoid arthritis, T1D – type 1 diabetes, T2D – type 2 diabetes). Analyses are conducted separately in the EstFin-based and the 1000G-based imputed datasets. The genome-wide significance threshold after correction for multiple testing is  $P < 6.25 \times 10^{-9}$ . For each locus, associated gene containing variant with the lowest  $P$  value, is reported. In the last two columns, results of fine-mapping analysis are shown with the numbers of putative causal variants per genomic region.

<sup>(1)</sup> Genome-wide significant ( $P < 3.27 \times 10^{-8}$ , 10-fold enrichment in Estonians) variants detected in MAF-enriched analysis in comparison of 503 European individuals from the 1000G phase 3 data.

| Trait        | Chromosomal locus       | Associated gene |               | Number of putative causal variants |           |
|--------------|-------------------------|-----------------|---------------|------------------------------------|-----------|
|              |                         | EstFin IRP      | 1000G IRP     | EstFin IRP                         | 1000G IRP |
| BMI          | 1p13.3                  | <i>AMPD2</i>    | <i>GPR61</i>  | 1                                  | 1         |
| BMI          | 1q25.2 <sup>(1)</sup>   | <i>SEC16B</i>   | Intergenic    | 1                                  | 1         |
| BMI          | 2p25.3 <sup>(1)</sup>   | Intergenic      | Intergenic    | 2                                  | 2         |
| BMI          | 6p12.3                  | -               | Intergenic    | -                                  | 1         |
| BMI          | 12q13.12                | <i>FAIM2</i>    | Intergenic    | 1                                  | 1         |
| BMI          | 16q12.2                 | <i>FTO</i>      | <i>FTO</i>    | 1                                  | 1         |
| BMI          | 18q21.32 <sup>(1)</sup> | Intergenic      | Intergenic    | 1                                  | 1         |
| CAD          | 9p21.3                  | Intergenic      | Intergenic    | 1                                  | 1         |
| RA           | 6p21.32 <sup>(1)</sup>  | Intergenic      | Intergenic    | 1                                  | 2         |
| T1D          | 1p13.2                  | <i>BCL2L15</i>  | -             | 1                                  | -         |
| T1D          | 6p21.32 <sup>(1)</sup>  | Intergenic      | Intergenic    | 5                                  | 3         |
| T2D          | 9q21.32                 | -               | <i>TLE1</i>   | -                                  | 1         |
| T2D          | 10q25.2-25.3            | <i>TCF7L2</i>   | <i>TCF7L2</i> | 1                                  | 1         |
| T2D          | 16q12.2                 | <i>FTO</i>      | <i>FTO</i>    | 1                                  | 1         |
| <b>Total</b> |                         | <b>12</b>       | <b>13</b>     | <b>17</b>                          | <b>17</b> |

125 To identify the likely causal variant at each locus, we performed fine-mapping analysis in all  
 126 significant genomic regions discovered in genome-wide association scan. All but three (BMI at  
 127 2p25.3, RA and T1D at the HLA-region) significant regions demonstrated only one likely causal  
 128 variant (Table 1). We also tested variants having allele frequency enrichment in Estonians as com-  
 129 pared to the 503 European individuals from the 1000G data. Genome-wide significant ( $P < 3.27 \times 10^{-8}$   
 130 for 10-fold enrichment) variants were detected for BMI at 1q25.2, 2p25.3, and 18q21.32 loci and for  
 131 RA and T1D in the HLA-region in both imputed datasets (Table 1).

132 In conclusion, single variant association analyses did not indicate major differences in results based on  
 133 these data imputed with ethnically matched and mixed IRPs.

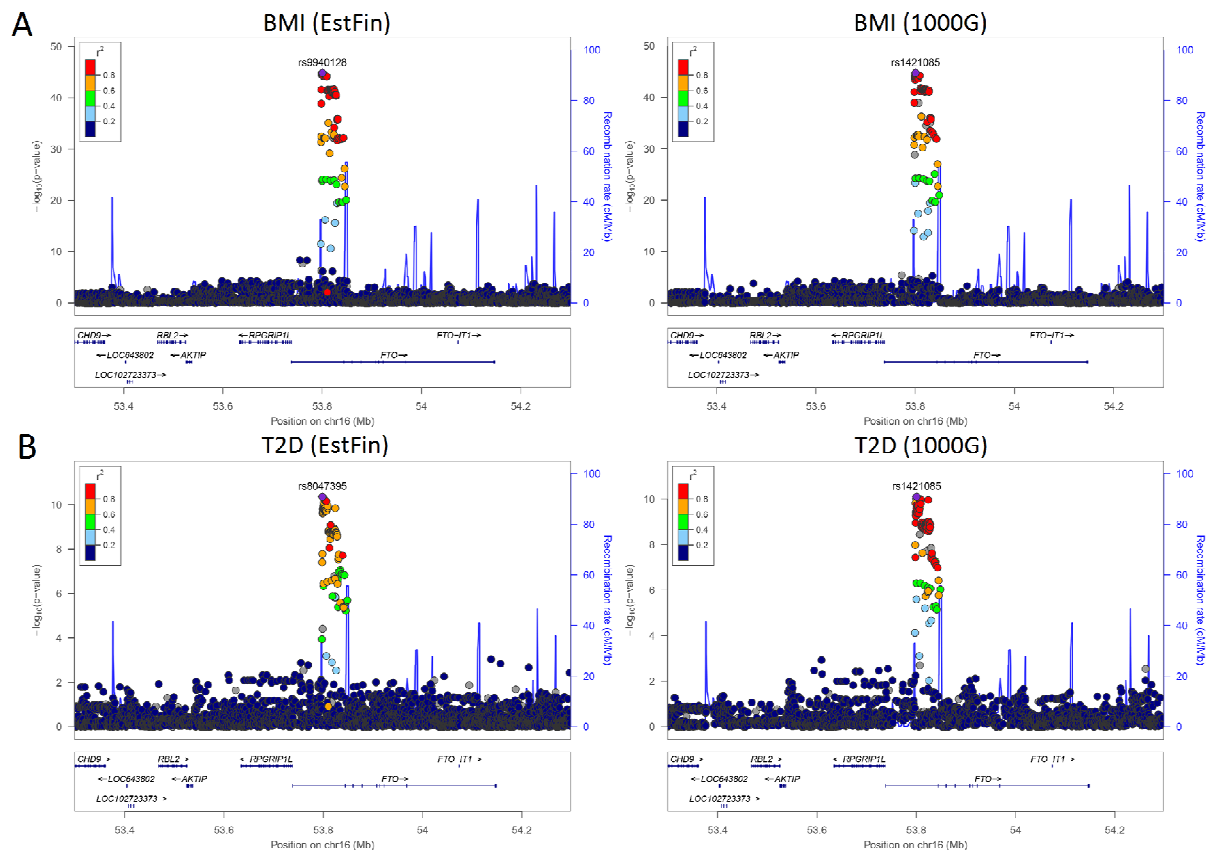

**Fig 2. Significant associations at the *FTO* locus.** The left panel of regional plot shows the genome-wide association analysis results for the EstFin-based imputed data, while the right panel shows results for the 1000G IRP imputed data. The purple symbol represents the lead variant, and the rest of the colour-coded variants denote LD with the lead variant estimated by  $r^2$  from the 1000G phase 3 (EUR population) data. Comparison of analysis results of both imputed datasets indicates that variants with the lowest  $P$  value do not overlap, but are highly correlated. A) Regional association plots for BMI. B) Regional association plots for T2D. Imputed data based on the EstFin panel provides evidence for an association between T2D and alleles of the *FTO* locus with the lowest  $P$  value at rs8047395 ( $P = 4.4 \times 10^{-11}$ ). The same SNV shows a significant association in the data imputed with 1000G IRP ( $P = 1.5 \times 10^{-10}$ ), but the lowest  $P$  value is at rs1421085 ( $P = 7.9 \times 10^{-11}$ , Pearson's  $r^2=0.82$  between rs8047395 and rs1421085).

## 134 Gene-based analysis

135 We conducted gene-based tests of rare (MAF < 1%) nonsynonymous (NS) and loss-of-function (LoF)  
 136 variants for eight complex traits separately in the imputed datasets. When considering genes with at  
 137 least two confidently imputed (INFO > 0.8) rare NS variants, we observed noteworthy differences in  
 138 the number of genes analysed – EstFin IRP outperformed 1000G, providing 12,930 and 1,274 unique  
 139 genes, respectively. In the analysis of rare LoF variants, we identified even more drastic differences –  
 140 663 genes were tested in the EstFin panel imputation and only six genes in the 1000G panel  
 141 imputation.



142 Consequently, whilst testing the genes including rare NS variants, we detected 38 significant gene-trait  
143 associations ( $P_{NS} < 4.83 \times 10^{-7}$ ) in the EstFin-based imputed data and four in the 1000G panel based  
144 imputation (Table 2). At significance level  $P_{LoF} < 9.40 \times 10^{-6}$  we detected 10 genes including rare LoF  
145 variants based on the EstFin imputed data and none in the 1000G-based imputation (Table 2). Com-  
146 parative results of gene-based analysis are presented in Figures 3 and S5. While none of these  
147 associated genes were implicated in our single variant GWAS, 122 NS and 22 LoF variants were  
148 involved in gene-wise analysis (S5 Table). We determined that the large majority (45 out of 52) of  
149 significant gene-trait associations relied on two or three NS/LoF variants. Seven out of 52 associations  
150 relied on four or more NS/LoF variants and the signal of joint contribution of rare variants was driven  
151 by multiple variants ( $P < 0.05$ ) for 22/52 tests (S5 Table).

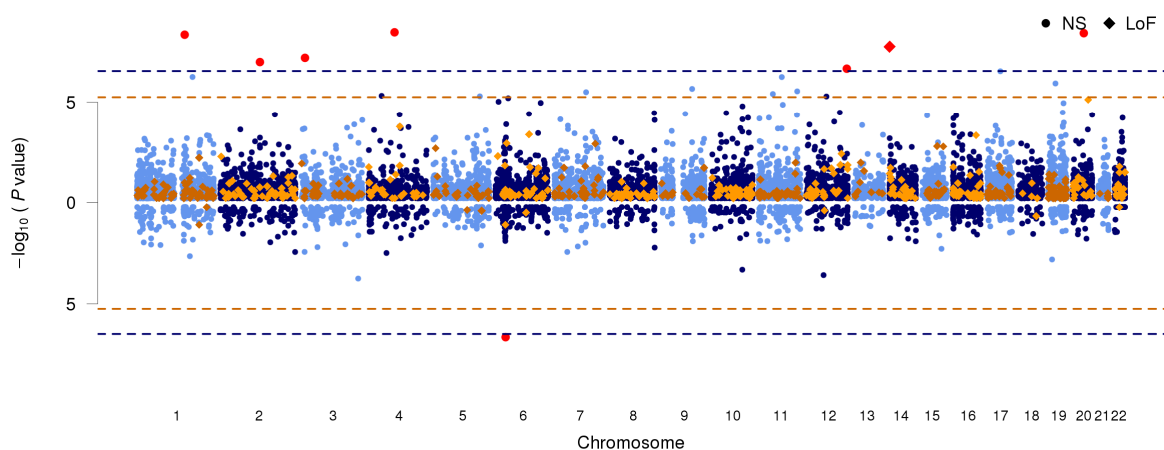

**Fig 3. Miami plot of the gene-based analysis on bipolar disorder.** The top panel shows the gene-based association analysis results using the EstFin-based imputed data, while the bottom part shows results for the 1000G IRP imputed data. Blue dots represent tested genes including NS variants and orange squares LoF variants. Dashed lines indicate significance levels after correction for multiple testing:  $P < 4.83 \times 10^{-7}$  for NS variants (blue) and  $P < 9.40 \times 10^{-6}$  for LoF variants (orange). Red symbols denote significant genes. In the analysis of NS variants we identify six genes based on the EstFin IRP data and one significant gene in the 1000G-based data. In the EstFin-based imputed data we detect a single gene-trait association of LoF substitutions, whereas none of the significant associations is observed in the data based on ethnically mixed 1000G IRP.

**Table 2. Overview of significant gene-based associations.** Genes with at least two confidently imputed (INFO > 0.8) rare (MAF < 1%) nonsynonymous (NS) and loss-of-function (LoF) variants are tested for association with complex traits (BMI – body mass index, BD – bipolar disorder, RA – rheumatoid arthritis, T1D – type 1 diabetes, T2D – type 2 diabetes). Analyses are performed separately in the EstFin-based and the 1000G-based imputed datasets. Multiple testing corrected significance levels are applied based on the number of genes tested in both datasets:  $P_{NS} < 4.83 \times 10^{-7}$  for genes containing NS variants and  $P_{LoF} < 9.40 \times 10^{-6}$  for genes containing LoF variants. First, the results of gene-based analysis in 36,716 Estonian Biobank (EBB) individuals are presented. Next, the gene-trait associations are validated in 405,379 UK Biobank (UKBB) individuals. Finally, for each significant gene-trait result detected in the EBB data, variant-trait association with the smallest  $P$  value from the UKBB single variant GWAS is provided.

| IRP    | Functional annotation | Trait | Gene            | Chr | Gene-based analysis of EBB data | Gene-based analysis of UKBB data | Single variant analysis of UKBB data |              |                       |         |        |                        |
|--------|-----------------------|-------|-----------------|-----|---------------------------------|----------------------------------|--------------------------------------|--------------|-----------------------|---------|--------|------------------------|
|        |                       |       |                 |     | $P$ value                       | $P$ value                        | Lead variant                         | Minor allele | MAF                   | Beta    | Se     | $P$ value              |
| 1000G  | NS                    | BD    | <i>GGNBP1</i>   | 6   | $3.35 \times 10^{-7}$           | 1                                | rs141041358                          | A            | $1.32 \times 10^{-3}$ | 0.0032  | 0.0011 | $5.08 \times 10^{-3}$  |
|        |                       | CD    | <i>HTR3D</i>    | 3   | $9.48 \times 10^{-10}$          | 0.676                            | rs570697703                          | G            | $4.02 \times 10^{-7}$ | 4.5451  | 1.4028 | $1.20 \times 10^{-3}$  |
|        |                       | CD    | <i>GPRC6A</i>   | 6   | $4.35 \times 10^{-7}$           | 0.749                            | rs150641887                          | A            | $3.84 \times 10^{-6}$ | 0.4667  | 0.0380 | $1.30 \times 10^{-34}$ |
|        |                       | T1D   | <i>FAM186B</i>  | 12  | $6.19 \times 10^{-8}$           | 0.220                            | rs140980069                          | T            | $3.56 \times 10^{-5}$ | 0.0385  | 0.0080 | $1.60 \times 10^{-6}$  |
| EstFin | NS                    | BMI   | <i>CYLD</i>     | 16  | $1.68 \times 10^{-7}$           | -                                | rs190787930                          | A            | $4.17 \times 10^{-3}$ | 0.0592  | 0.0190 | $1.89 \times 10^{-3}$  |
|        |                       | BD    | <i>SHE</i>      | 1   | $7.88 \times 10^{-9}$           | 0.179                            | rs79480105                           | A            | $4.49 \times 10^{-2}$ | 0.0008  | 0.0003 | $1.01 \times 10^{-2}$  |
|        |                       | BD    | <i>AMMECR1L</i> | 2   | $1.74 \times 10^{-7}$           | 0.375                            | rs137977337                          | T            | $1.72 \times 10^{-3}$ | 0.0045  | 0.0015 | $2.85 \times 10^{-3}$  |
|        |                       | BD    | <i>VGLL4</i>    | 3   | $1.08 \times 10^{-7}$           | 1                                | rs528386411                          | C            | $1.16 \times 10^{-5}$ | 0.1132  | 0.0323 | $4.49 \times 10^{-4}$  |
|        |                       | BD    | <i>LIN54</i>    | 4   | $6.00 \times 10^{-9}$           | 0.324                            | rs142253468                          | C            | $3.78 \times 10^{-3}$ | 0.0825  | 0.0110 | $6.05 \times 10^{-14}$ |
|        |                       | BD    | <i>FZD10</i>    | 12  | $3.69 \times 10^{-7}$           | 0.711                            | rs1046893                            | C            | $3.76 \times 10^{-1}$ | 0.0001  | 0.0001 | $2.75 \times 10^{-1}$  |
|        |                       | BD    | <i>SAMHD1</i>   | 20  | $6.62 \times 10^{-9}$           | 0.755                            | rs566610995                          | G            | $1.58 \times 10^{-3}$ | 0.0029  | 0.0010 | $4.59 \times 10^{-3}$  |
|        |                       | CD    | <i>HTR3D</i>    | 3   | $2.38 \times 10^{-8}$           | 0.676                            | rs570697703                          | G            | $4.02 \times 10^{-7}$ | 4.5451  | 1.4028 | $1.20 \times 10^{-3}$  |
|        |                       | CD    | <i>PLA2G12A</i> | 4   | $1.44 \times 10^{-7}$           | 0.468                            | rs763365177                          | G            | $1.61 \times 10^{-3}$ | 0.0033  | 0.0017 | $5.25 \times 10^{-2}$  |
|        |                       | CD    | <i>HLA-G</i>    | 6   | $4.33 \times 10^{-7}$           | -                                | rs80153902                           | A            | $3.60 \times 10^{-5}$ | 0.0360  | 0.0106 | $6.83 \times 10^{-4}$  |
|        |                       | CD    | <i>RAPGEF5</i>  | 7   | $1.55 \times 10^{-7}$           | 0.227                            | rs578001462                          | T            | $2.16 \times 10^{-4}$ | 0.0191  | 0.0048 | $6.65 \times 10^{-5}$  |
|        |                       | CD    | <i>ZNF92</i>    | 7   | $5.86 \times 10^{-10}$          | 0.046                            | rs144227733                          | A            | $2.22 \times 10^{-4}$ | 0.0109  | 0.0045 | $1.58 \times 10^{-2}$  |
|        |                       | CD    | <i>ORC5</i>     | 7   | $1.78 \times 10^{-10}$          | 1                                | rs76304209                           | T            | $4.26 \times 10^{-3}$ | 0.0037  | 0.0011 | $2.23 \times 10^{-4}$  |
|        |                       | CD    | <i>R3HCC1</i>   | 8   | $6.58 \times 10^{-9}$           | 0.368                            | rs375458319                          | A            | $2.45 \times 10^{-3}$ | 0.0027  | 0.0014 | $4.82 \times 10^{-2}$  |
|        |                       | CD    | <i>TMEM64</i>   | 8   | $5.18 \times 10^{-10}$          | 0.083                            | rs185086305                          | T            | $2.93 \times 10^{-5}$ | 0.0500  | 0.0138 | $2.98 \times 10^{-4}$  |
|        |                       | CD    | <i>NEU3</i>     | 11  | $3.61 \times 10^{-7}$           | 0.876                            | rs35872360                           | G            | $2.86 \times 10^{-1}$ | -0.0004 | 0.0001 | $1.12 \times 10^{-2}$  |
|        |                       | CD    | <i>EED</i>      | 11  | $1.87 \times 10^{-8}$           | -                                | rs534451904                          | A            | $2.44 \times 10^{-3}$ | 0.0040  | 0.0014 | $2.97 \times 10^{-3}$  |
|        |                       | CD    | <i>KCNA1</i>    | 12  | $1.16 \times 10^{-7}$           | -                                | rs149959487                          | A            | $3.80 \times 10^{-4}$ | -0.0032 | 0.0036 | $3.68 \times 10^{-1}$  |
|        |                       | CD    | <i>TAOK2</i>    | 16  | $7.01 \times 10^{-9}$           | 0.792                            | rs10445105                           | G            | $5.37 \times 10^{-2}$ | -0.0007 | 0.0003 | $1.76 \times 10^{-2}$  |
|        |                       | CD    | <i>ANKRD30B</i> | 18  | $3.03 \times 10^{-8}$           | 0.766                            | rs9675858                            | T            | $4.99 \times 10^{-1}$ | -0.0004 | 0.0001 | $4.03 \times 10^{-4}$  |
|        |                       | CD    | <i>TRIP10</i>   | 19  | $1.36 \times 10^{-7}$           | 0.288                            | rs61757561                           | C            | $1.68 \times 10^{-2}$ | 0.0012  | 0.0005 | $2.20 \times 10^{-2}$  |
|        |                       | CD    | <i>GRWD1</i>    | 19  | $1.59 \times 10^{-7}$           | 0.022                            | rs199819631                          | G            | $1.11 \times 10^{-3}$ | 0.0065  | 0.0021 | $2.13 \times 10^{-3}$  |
|        |                       | CD    | <i>WRB</i>      | 21  | $1.37 \times 10^{-7}$           | 0.105                            | rs553712185                          | G            | $2.23 \times 10^{-1}$ | 0.0004  | 0.0002 | $1.01 \times 10^{-2}$  |
|        |                       | CD    | <i>NIPSNAP1</i> | 22  | $1.05 \times 10^{-7}$           | -                                | rs549356766                          | A            | $2.36 \times 10^{-6}$ | -0.0049 | 0.0530 | $9.27 \times 10^{-1}$  |
|        |                       | RA    | <i>CREBRF</i>   | 5   | $3.24 \times 10^{-9}$           | 0.260                            | rs78586862                           | G            | $5.66 \times 10^{-2}$ | -0.0015 | 0.0005 | $5.51 \times 10^{-3}$  |
|        |                       | RA    | <i>HSPB1</i>    | 7   | $3.97 \times 10^{-7}$           | -                                | rs145206720                          | C            | $2.62 \times 10^{-4}$ | -0.0094 | 0.0081 | $2.47 \times 10^{-1}$  |
|        |                       | RA    | <i>PRPF31</i>   | 19  | $2.83 \times 10^{-7}$           | 0.783                            | rs187106635                          | A            | $2.40 \times 10^{-3}$ | -0.0066 | 0.0027 | $1.58 \times 10^{-2}$  |

| IRP    | Functional annotation | Trait | Gene            | Chr | Gene-based analysis of EBB data | Gene-based analysis of UKBB data | Single variant analysis of UKBB data |              |                       |         |        |                       |
|--------|-----------------------|-------|-----------------|-----|---------------------------------|----------------------------------|--------------------------------------|--------------|-----------------------|---------|--------|-----------------------|
|        |                       |       |                 |     | <i>P</i> value                  | <i>P</i> value                   | Lead variant                         | Minor allele | MAF                   | Beta    | Se     | <i>P</i> value        |
|        | NS                    | RA    | <i>THOC5</i>    | 22  | $1.47 \times 10^{-7}$           | 0.284                            | rs571323390                          | C            | $1.08 \times 10^{-3}$ | 0.0040  | 0.0012 | $5.44 \times 10^{-4}$ |
|        |                       | T1D   | <i>RNF13</i>    | 3   | $6.88 \times 10^{-9}$           | 0.586                            | rs140200425                          | C            | $2.90 \times 10^{-2}$ | 0.0009  | 0.0003 | $1.25 \times 10^{-3}$ |
|        |                       | T1D   | <i>CENPU</i>    | 4   | $7.30 \times 10^{-9}$           | 0.617                            | rs776959139                          | A            | $2.24 \times 10^{-3}$ | 0.0030  | 0.0008 | $7.98 \times 10^{-5}$ |
|        |                       | T1D   | <i>HIST1H1C</i> | 6   | $3.63 \times 10^{-7}$           | 0.371                            | rs201637343                          | T            | $5.73 \times 10^{-4}$ | 0.0065  | 0.0021 | $2.08 \times 10^{-3}$ |
|        |                       | T1D   | <i>BAK1</i>     | 6   | $5.96 \times 10^{-11}$          | 0.583                            | rs11757379                           | T            | $2.26 \times 10^{-1}$ | 0.0003  | 0.0001 | $4.96 \times 10^{-3}$ |
|        |                       | T1D   | <i>FAM170B</i>  | 10  | $1.14 \times 10^{-8}$           | 0.464                            | rs75297145                           | T            | $2.09 \times 10^{-1}$ | 0.0002  | 0.0001 | $3.59 \times 10^{-2}$ |
|        |                       | T1D   | <i>SLC22A8</i>  | 11  | $1.61 \times 10^{-7}$           | 0.210                            | rs11568481                           | A            | $2.33 \times 10^{-4}$ | 0.0110  | 0.0023 | $1.41 \times 10^{-6}$ |
|        |                       | T1D   | <i>C11orf30</i> | 11  | $1.32 \times 10^{-7}$           | 0.576                            | rs74904466                           | A            | $2.70 \times 10^{-2}$ | 0.0008  | 0.0002 | $2.09 \times 10^{-4}$ |
|        |                       | T1D   | <i>ISLR</i>     | 15  | $3.63 \times 10^{-7}$           | 0.249                            | rs1052622                            | G            | $3.23 \times 10^{-1}$ | 0.0002  | 0.0001 | $4.14 \times 10^{-2}$ |
|        |                       | T1D   | <i>HOXB6</i>    | 17  | $3.23 \times 10^{-7}$           | 1                                | rs33990581                           | T            | $1.22 \times 10^{-2}$ | -0.0006 | 0.0004 | $1.70 \times 10^{-1}$ |
| EstFin | LoF                   | T1D   | <i>ZNF701</i>   | 19  | $1.40 \times 10^{-7}$           | 0.324                            | rs370776009                          | G            | $3.43 \times 10^{-1}$ | 0.0002  | 0.0001 | $2.91 \times 10^{-2}$ |
|        |                       | BD    | <i>OR11H6</i>   | 14  | $3.07 \times 10^{-8}$           | -                                | rs143225754                          | T            | $1.28 \times 10^{-3}$ | 0.0021  | 0.0011 | $6.67 \times 10^{-2}$ |
|        |                       | CD    | <i>HLA-G</i>    | 6   | $2.67 \times 10^{-7}$           | -                                | rs80153902                           | A            | $3.60 \times 10^{-3}$ | 0.0360  | 0.0106 | $6.83 \times 10^{-4}$ |
|        |                       | CD    | <i>IQCE</i>     | 7   | $2.51 \times 10^{-6}$           | -                                | rs80187333                           | A            | $6.83 \times 10^{-3}$ | -0.0023 | 0.0008 | $6.29 \times 10^{-3}$ |
|        |                       | CD    | <i>YME1L1</i>   | 10  | $1.47 \times 10^{-7}$           | -                                | rs558886293                          | T            | $2.33 \times 10^{-3}$ | 0.0043  | 0.0015 | $3.71 \times 10^{-3}$ |
|        |                       | CD    | <i>ANKRD30B</i> | 18  | $9.83 \times 10^{-8}$           | -                                | rs9675858                            | T            | $4.99 \times 10^{-1}$ | -0.0004 | 0.0001 | $4.03 \times 10^{-4}$ |
|        |                       | CD    | <i>FERMT1</i>   | 20  | $1.43 \times 10^{-7}$           | -                                | rs78566304                           | A            | $1.06 \times 10^{-3}$ | 0.0069  | 0.0021 | $1.09 \times 10^{-3}$ |
|        |                       | T1D   | <i>ALLC</i>     | 2   | $1.42 \times 10^{-6}$           | -                                | rs573758969                          | C            | $1.45 \times 10^{-3}$ | 0.0036  | 0.0010 | $2.38 \times 10^{-4}$ |
|        |                       | T1D   | <i>LPP</i>      | 3   | $9.76 \times 10^{-8}$           | -                                | rs186012592                          | G            | $6.79 \times 10^{-3}$ | 0.0224  | 0.0045 | $8.11 \times 10^{-7}$ |
|        |                       | T1D   | <i>ZIC2</i>     | 13  | $1.44 \times 10^{-11}$          | -                                | rs13542                              | A            | $2.23 \times 10^{-1}$ | 0.0002  | 0.0001 | $4.98 \times 10^{-2}$ |
|        |                       | T1D   | <i>ZNF83</i>    | 19  | $2.73 \times 10^{-8}$           | 0.609                            | rs329940                             | A            | $1.09 \times 10^{-4}$ | 0.0168  | 0.0056 | $2.50 \times 10^{-3}$ |

## 152 **Validation of gene-based analysis**

153 We first selected 52 significant gene-trait associations from the gene-wise analysis and repeated the  
154 gene-based tests using 405,379 individuals from the UK Biobank [39,40]. The strongest gene-trait  
155 associations were detected with CD in *GRWD1* ( $P = 0.022$ ) and *ZNF92* ( $P = 0.046$ ) genes, but neither  
156 of these were significant after correcting for multiple testing (Table 2).

157 Secondly, we used variant-wise GWAS results of the UK Biobank in 361,194 individuals [41].  
158 Although approximately only 25% of the tested rare NS and LoF variants overlapped between the  
159 Estonian Biobank and the UK Biobank data, the UKBB GWAS analysis confirmed signals ( $P < 10^{-5}$ )  
160 in five detected genes. Considering the lowest  $P$  values in our candidate gene regions, we detected two  
161 significant ( $P = 1.30 \times 10^{-34}$ , CD in *GPRC6A* with the 1000G imputation;  $P = 6.05 \times 10^{-14}$ , BD in  
162 *LIN54* with the EstFin imputation) and three suggestive ( $P = 8.11 \times 10^{-7}$ , T1D in *LPP* with the EstFin  
163 imputation,  $P = 1.41 \times 10^{-6}$ , T1D in *SLC22A8* with the EstFin imputation,  $P = 1.60 \times 10^{-6}$ , T1D in  
164 *FAM186B* with the 1000G imputation) associations in the UKBB GWAS data (Table 2). Significant  
165 gene-based findings with presumptive evidence of biological meaningfulness including *VGLLA*, *LPP*  
166 and *HLA-G* as well as few other loci are discussed in S1 Appendix. Relevant GWAS Catalog entries  
167 related to significant findings from gene-based analysis are presented in S6 Table.

168 Gene-based analysis of rare variants demonstrated that our ethnically matched panel outperformed the  
169 1000G-based imputation, provided 10-fold increase in tested genes and significant findings.  
170 Validation indicated that most of the significantly associated genes were previously known, but there  
171 were some which turned out to be worthwhile novel findings.

## 172 **Discussion**

173 Over the past few years, ethnically matched imputation reference panels have been implemented in  
174 favour of widely used cosmopolitan 1000G and HRC panels. The former mentioned panels have  
175 showed great improvement in imputation accuracy, but their effect to the downstream analysis is not  
176 very well examined. In the current study, we performed a comparison of ethnically matched EstFin  
177 and ethnically mixed 1000G-based imputed genotypes in the Estonian Biobank study cohort of

178 ~52,000 individuals. In addition to the single variant analysis, we examined downstream differences as  
179 a measure of identified associations in MAF-enriched and rare-variant analysis. We have  
180 demonstrated that ethnically matched panel empowers the detection of rare variant signals and have  
181 identified clinically significant novel loci for complex diseases which will be discussed further below.

### 182 **Ethnically matched reference panel leads to greater improvement in downstream** 183 **consequences for rare variants compared to common variants**

184 Ethnically matched panel provides a significantly higher proportion of confidently imputed variants  
185 compared to the 1000G panel (S1 Table). The difference increases with the decrease of MAF, because  
186 of the insufficient representation of rare variants in the 1000G IRP. We observed that single variant  
187 GWAS identified a similar number of genome-wide significant findings in these two imputed datasets  
188 and we did not detect any major differences in fine-mapping of these loci. At the same time, it should  
189 be taken into consideration that in the current analyses we rely on a relatively small number of disease  
190 cases, resulting in limited statistical power. It is likely one of the main factors why we did not observe  
191 any major differences in single variant GWA analyses. Possibly these results would be different with  
192 significantly larger cohorts as, at some point, one should start detecting low-frequency and rare  
193 variants that have been imputed confidently and therefore can be tested with the ethnically matched  
194 IRPs. Secondly, 1000G reference panel contains European haplotypes, and therefore it can be a  
195 relatively good reference for imputing common variants in the Estonian population. But the results can  
196 differ for those populations, which are more distant from the populations used in transethnic  
197 imputation reference sets.

198 Rare variant analyses demonstrated great differences, where the EstFin-based imputation clearly out-  
199 performed the 1000G imputation, allowing for the identification of 10 times more genome-wide  
200 significant genes (Table 2). The EstFin IRP includes a larger number of haplotypes close to the target  
201 samples, deriving unique variants from genomes not included in the 1000G panel. This improves the  
202 chances of a rare variant being effectively tagged by a haplotype. Moreover, including haplotypes  
203 from ethnically distant populations may not accurately capture LD patterns of population-specific  
204 variants or imputation can introduce polymorphic variants in the target samples that are actually

205 monomorphic as observed previously [10]. Our results empirically demonstrate the contribution of  
206 rare variants in complex traits analysis using ethnically matched panel, as compared to ethnically  
207 mixed population reference.

## 208 **Validation of gene-based analysis**

209 Validation of gene-based analysis results in the UK Biobank individual-level data detected two  
210 significant gene-trait signals ( $P < 0.05$ ), but neither remained significant after multiple testing  
211 correction. For gene-trait associations detected in the EBB data, we were not able to validate 6 (out of  
212 42) and 9 (out of 10) genes containing NS and LoF variants, respectively. This was accounted for the  
213 UKBB data containing less than two NS and LoF variants within these genes (Table 2). A likely  
214 explanation is that the ethnically matched panel captures a significantly larger number of such rare  
215 variants which are not well-captured through the imputation with more heterogeneous reference  
216 panels. Therefore we argue that failing to validate most of the gene-based analysis results in the UK  
217 Biobank data can be due to the population-specific nature of the rare variant findings.

218 Nevertheless, some of the associations were validated by matching the observed significant genes with  
219 the variants located in the same gene regions in the UKBB single variant association analysis, as well  
220 as many of the genes detected by us were associated with relevant traits in literature (S1 Appendix).  
221 We hypothesize about a causative role for *LPP* variants conferring susceptibility to T1D – an  
222 assumption being initially rejected in a study involving both celiac disease and T1D patients [42].  
223 Pleiotropic effects have been reported for *LPP* in association studies involving diverse autoimmune di-  
224 seases where shared susceptibility factors outside the HLA-region are widely recognized. In addition,  
225 *LPP* mRNA and protein are expressed in multiple tissues, including islets of Langerhans and pancreas,  
226 and *LPP* gene is relatively intolerant of LoF variation (ExAC pLI = 0.58) [43].

227 In conclusion, we observed that analysis of rare variants outperforms the ethnically matched  
228 imputation reference panel compared to multi-ethnic panels. The use of an ethnically matched panel  
229 ensures a far better imputation quality for rare variation and allows capturing more population-specific  
230 variants, enabling more efficient discovery of disease-associated genes.

## 231 **Materials and methods**

### 232 **Study cohorts**

233 **Estonian Biobank.** The Estonian Biobank (EBB) is a population-based biobank of the Estonian  
234 Genome Center at the University of Tartu. EBB contains almost 52,000 individuals of the Estonian  
235 population (aged  $\geq 18$  years), which closely reflects the age, sex and geographical distribution of the  
236 Estonian adult population [44]. At baseline, the general practitioners performed a standardized health  
237 examination of the participants, who also donated blood samples for DNA, white blood cells and  
238 plasma tests and filled out a questionnaire on health-related topics. All biobank participants have  
239 signed a broad informed consent form, which allows periodical linking to national registries,  
240 electronic health record databases and hospital information systems. The majority of biobank  
241 participants have been analysed using genotyping arrays. High-coverage whole genome sequencing  
242 data is available for the 2,535 individuals, selected randomly by county of birth. The project was  
243 approved by the Research Ethics Committee of the University of Tartu (application number 234/T-12).

244 **FINRISK.** FINRISK is a series of health examination surveys carried out by the National Institute  
245 for Health and Welfare (formerly National Public Health Institute) of Finland every five years since  
246 1972. The surveys are based on random population samples from five (or six in 2002) specified  
247 geographical areas of Finland. The samples have been stratified by 10-year age group, sex and study  
248 area. The sample sizes have varied from approximately 7,000 to 13,000 individuals and the  
249 participation rates from 60% to 90% in different study years. The age-range was 25-64 years until  
250 1992 and 25-74 since 1997. The survey included a self-administered questionnaire, a standardized  
251 clinical examination carried out by specifically trained study nurses and drawing of a blood sample.  
252 Details of the examination have been previously described [45,46]. DNA has been collected since the  
253 1992 survey from approximately 34,000 participants. The surveys have appropriate ethical approvals  
254 following the usual practices of each survey-year and the participants have signed an informed  
255 consent. The validity of clinical diagnoses in these registers has been documented in several  
256 publications [47–50].



257 **Finnish Migraine Families collection.** The families were collected over a period of 25 years from  
258 six headache clinics in Finland (Helsinki, Turku, Jyväskylä, Tampere, Kemi, and Kuopio) and through  
259 advertisements on the national migraine patient organization web page (<http://migreeni.org/>).  
260 Geographically, family members are represented from across the entire country. The current collection  
261 consists of 1,589 families, which included a complete range of pedigree sizes from small to large (e.g.,  
262 1,023 families had 1–4 related individuals and 566 families had 5+ related individuals). Currently, the  
263 collection consists of 8,319 family members, of whom 5,317 have a migraine diagnosis based on the  
264 third edition of the established International Classification for Headache Disorders (ICHD-3) criteria  
265 [51].

266 **MESTA.** The Living Conditions and Physical Health of Outpatients with Schizophrenia study  
267 recruited 276 outpatients with schizophrenia spectrum disorder (ICD-10 F20–F29) from the psychosis  
268 outpatient clinics of three municipalities in Finland (Järvenpää, Mäntsälä, and Tuusula). The study  
269 protocol consisted of a questionnaire and interview assessing current symptoms, functioning, lifestyle,  
270 and a comprehensive health examination. DNA samples were collected as a part of the study based on  
271 a separate informed consent [52,53].

272 **Health 2000.** The Finnish Health 2000 Survey was based on a nationally representative sample of  
273 8,028 persons aged 30 years or over living in mainland Finland. A two-stage stratified cluster  
274 sampling design was used. The sampling frame was regionally stratified according to the five  
275 university hospital regions, and from each university hospital region 16 health care districts were  
276 sampled as clusters (altogether 80 health care districts). Persons within the health care districts were  
277 selected by systematic sampling, and persons aged 80 years and over were oversampled by doubling  
278 the sampling fraction. The field work took place between September 2000 and June 2001, and  
279 consisted of a home interview and a health examination at the local health centre, or a condensed inter-  
280 view and health examination of non-respondents at home. In addition, several questionnaires were  
281 used to assess symptoms, lifestyle, and exposures related to different health problems. Of the study  
282 sample, 88% were interviewed, 80% attended a comprehensive health examination and 5% attended a  
283 condensed examination at home [54].



## 284 **Ethnically matched imputation reference panel**

285 WGS data for Estonian and Finnish samples were generated and jointly processed at the Broad  
286 Institute of MIT and Harvard. WGS samples had PCR-free DNA preparation (Estonian Biobank,  
287 FINRISK, Finnish Migraine Families collection, Health 2000) and PCR-amplified preparation  
288 (MESTA), followed by sequencing on the Illumina HiSeq X platform with the use of 151-bp paired-  
289 end reads with mean coverage of  $\sim 30\times$ . Sequenced reads were aligned to the GRCh37 human  
290 reference genome assembly using BWA-MEM v0.7.7 [55]; PCR duplicates were marked using Picard  
291 v1.136 (<http://broadinstitute.github.io/picard/>), and the Genome Analysis Toolkit (GATK) v3.4-46  
292 [56,57] best-practice guideline was applied for further BAM processing and variant calling.

293 Samples were excluded based on high contamination ( $>5\%$ ), high proportion of chimeric alignment  
294 ( $>5\%$ ), low genotype quality ( $GQ < 50$ ), low coverage ( $<20\times$ ), high coverage ( $> \text{mean} + 3 \text{ sd}$ ),  
295 relatedness (identity-by-descent (IBD)  $> 0.1$ ), sex mismatches, high genotype discordance ( $>5\%$ )  
296 between sequenced and chip-based data. Additionally, samples were filtered (mean  $\pm 3 \text{ sd}$ ) based on  
297 total number of variants, non-reference variants, singletons, heterozygous/homozygous variants ratio  
298 (single nucleotide variants (SNVs) and indels were tested separately in the above-mentioned cases),  
299 insertion/deletion ratio for novel indels, insertion/deletion ratio for indels observed in dbSNP, and  
300 transition/transversion ratio. After filtering and exclusion of duplicates, the WGS datasets were  
301 merged, containing 4,135 individuals (2,279 Estonians and 1,856 Finns).

302 The following variants were set to missing:  $GQ < 20$ , read depth  $> 200\times$ , phred-scaled genotype  
303 likelihood of reference allele  $< 20$  for heterozygous and homozygous variant calls, and allele balance  
304  $< 0.2$  or  $> 0.8$  for heterozygous calls. The GATK Variant Quality Score Recalibration (VQSR) was  
305 used to filter variants with a truth sensitivity of 99.8% for SNVs and of 99.9% for indels. Variants  
306 with inbreeding coefficient  $< -0.3$ , quality by depth  $< 2$  for SNVs and  $< 3$  for indels, call rate  $< 90\%$ ,  
307 and Hardy-Weinberg equilibrium (HWE)  $P$  value  $< 1 \times 10^{-9}$  were removed. Monomorphic, multi-allelic  
308 variants, and low-complexity regions [58] were further excluded. The final IRP contains 38,226,084  
309 variants.

310 Autosomal chromosomes and GRCh37 (hg19) human reference genome assembly was used for all  
311 analysis.

## 312 **Chip-based genotype data**

313 The EBB participants have been analysed using Illumina genotyping arrays: 1) Global Screening  
314 Array (GSA, N=33,277), 2) HumanCoreExome (CE, N=7,832), 3) HumanOmniExpress (OMNI,  
315 N=8,137), and 4) 370K (N=2,640). Individuals with missing phenotype data were excluded. Final set  
316 of genotyped data contained 48,163 unique individuals. The genotype calling for the microarrays was  
317 performed using Illumina's GenomeStudio v2010.3 software. The genotype calls for rare variants on  
318 the GSA array were corrected using the zCall software (version May 8th, 2012). After variant calling,  
319 the data was filtered using PLINK v.1.90 [59] by sample (call rate > 95%, no sex mismatches between  
320 phenotype and genotype data, heterozygosity < mean  $\pm$  3 sd) and marker-wise (HWE  $P$  value >  $1 \times$   
321  $10^{-6}$ , call rate > 95%, and for the GSA array additionally by Illumina GenomeStudio GenTrain score >  
322 0.6, Cluster Separation Score > 0.4). Before the imputation, variants with MAF < 1% and C/G or T/A  
323 polymorphisms as well as indels were removed, as these genotype calls do not allow precise phasing  
324 and imputation.

## 325 **Phasing and imputation**

326 The WGS-based imputation reference panel was phased using Eagle v2.3 [60,61] with default  
327 parameters except the *Kpbwt* parameter that was set to 20000 to increase accuracy. Pre-phasing of  
328 genotyped data was performed in similar manner for all four arrays separately with Eagle and imputed  
329 with Beagle v4.1 [62]. All pre-phased genotype datasets were imputed twice using the following  
330 reference panels: 1) EstFin IRP containing 8,270 reference haplotypes and 38.2 M autosomal variants;  
331 2) 1000G IRP holding 5,008 reference haplotypes and 81.7 M autosomal markers. All four imputed  
332 arrays were merged by IRP with BCFtools v1.6 (<https://samtools.github.io/bcftools/bcftools.html>).  
333 Imputation information measure (INFO-value) [4] were added using BCFtools plugin 'impute-info'.  
334 Monomorphic, multi-allelic and directly genotyped variants were excluded for all downstream  
335 analyses. Only confidently imputed variants (INFO-value > 0.8) with MAF > 0.05% were considered:  
336 13,859,717 (12,872,515 SNVs, 987,202 indels) variants imputed with the EstFin IRP and 9,058,236  
337 (8,232,261 SNVs, 825,975 indels) variants imputed with the 1000G IRP (Fig 1).

## 338 **Phenotypes**

339 In the association analysis, only unrelated individuals were included (IBD sharing < 0.2). Samples  
340 were excluded by choosing the minimal list of related individuals to break all kinship ties and, if  
341 possible, cases were preferred over controls using RELOUT5 tool from Allele  
342 (<http://www.toomashaller.com/allele.html>). Questionnaire-based data was linked to the electronic  
343 health records (the Estonian Health Insurance database, data available for years 2003–2015) and other  
344 health-related databases like the Estonian Causes of Death Registry (2003–2015), and the Estonian  
345 Cancer Registry (2003–2013).

346 After linking, dead people without time of death, participants without records from registries, and  
347 individuals older than 80 years at recruitment were excluded. The latter because diagnoses in the  
348 elderly people are often related to significant risk-altering comorbidities (cancer or cardiovascular  
349 diseases). Associations of body mass index, three cardiometabolic (coronary artery disease,  
350 hypertension, type 2 diabetes) and four autoimmune (bipolar disorder, Crohn's disease, rheumatoid  
351 arthritis, type 1 diabetes) diseases were analyzed in 36,716 Estonians (S2 Table).

## 352 **Single variants analysis**

353 Single variant analysis was conducted with Hail 0.1 (<http://broadinstitute.github.io/picard/>). Linear  
354 regression was used to test each variant's allelic dosage additive effect with body mass index, and  
355 Firth [63] logistic regression with seven diseases. Models were adjusted for age, sex, first ten principal  
356 components (PC1-10), and genotype array. Only confidently imputed variants (INFO > 0.8) with MAF  
357 > 0.05% were considered. A multiple testing corrected significance level ( $5 \times 10^{-8} / 8$  phenotypes) =  
358  $6.25 \times 10^{-9}$  were used.

359 All genome-wide significant loci were visualized by regional association plots using LocusZoom  
360 v0.4.8 [64] with the 1000G phase 3 European population LD reference panel. Pairwise examination of  
361 quantile-quantile plots of GWAS *P* values indicated that the distribution of the test statistics were  
362 nearly identical for both datasets, and did not demonstrate significant genomic inflation (S6 Fig). All  
363 significantly associated loci were compared to the National Human Genome Research Institute  
364 (NHGRI-EBI) GWAS Catalog [1] (April 10, 2018) data.

## 365 **Fine-mapping**

366 To identify causal variants that denote molecular mechanisms behind the associations, we performed  
367 fine-mapping analysis using FINEMAP v1.3 [65] around ( $\pm$  500 kilobase (kb)) genome-wide  
368 significant loci detected by variant-wise analysis (Table 1). FINEMAP was applied with default  
369 parameters, allowing for at most five causal variants and the highest posterior probability for the  
370 number of causal signals was used.

## 371 **Enrichment analysis**

372 Enriched variants in the EstFin imputed data were detected in comparison of 503 European (EUR)  
373 individuals from the 1000G phase 3 data. Enrichment rates were calculated as MAF in Estonians (Est)  
374 divided by MAF in 1000G EUR individuals:

$$375 \text{ Enrichment} = \frac{\text{MAF}_{\text{Est}}}{\text{MAF}_{1000\text{G\_EUR}}}.$$

376 Corresponding Bonferroni corrected significance level for variants enriched 10-fold in Estonians  
377 (enrichment  $>$  10) was  $[0.05 / (191,099 \text{ variants} \times 8 \text{ phenotypes})] = 3.27 \times 10^{-8}$ .

## 378 **Gene-based analysis**

379 To determine the joint contribution of rare variants on eight complex traits, we implemented gene-  
380 based SKAT-O [27] tests with EPACTS (<https://genome.sph.umich.edu/wiki/EPACTS>). All variants  
381 were annotated with EPACTS module 'anno' (GENCODE v14 [66]). Only nonsynonymous  
382 (nonsynonymous, normal splice site or stop gain) and loss-of-function (stop gain, essential splice site  
383 or frameshift) variants with INFO  $>$  0.8 and  $0.000001\% <$  MAF  $<$  1% were included. Models were  
384 adjusted for age, sex, PC1-10 and genotype arrays. Results were post-filtered that each gene contained  
385 at least two NS or LoF variants. We identified 12,930 (663) and 1,274 (9) NS (LoF) genes in the  
386 EstFin and the 1000G IRP-based imputed data, respectively. Bonferroni corrected significance levels  
387 based on the number of identified genes in both imputed datasets were used:  $[0.05 / (12,951 \times 8$   
388  $\text{phenotypes})] = 4.83 \times 10^{-7}$  and  $[0.05 / (665 \times 8 \text{ phenotypes})] = 9.40 \times 10^{-6}$  for NS and LoF genes,  
389 respectively.

## 390 **UK Biobank data**

391 The UK Biobank enrolled about 500,000 people aged between 40-69 years in 2006-2010 from across  
392 the United Kingdom [67]. Two approaches were used to validate significant gene-trait associations  
393 from the UKBB data:

394 1) We used genotyped and imputed individual-level data as released by UK Biobank in March 2018  
395 [39,40]. In the analysis we used 405,379 unrelated (IBD sharing  $< 0.2$ ) individuals with European  
396 origin and confidently imputed variants (INFO  $> 0.8$ ). Diagnosis of prevalent disease was based on  
397 International Classification of Diseases (ICD-10) diagnosis codes and self-reported data. The same  
398 SKAT-O models were applied as used to discover 52 significant gene-trait associations in the  
399 Estonian Biobank data (Table 2).

400 2) We used GWAS analysis results of the UK Biobank in 361,194 individuals provided by the Neale  
401 lab [41] and selected variant-trait results with the lowest  $P$  value for each significant gene-trait  
402 association (gene  $\pm 5$  kb) detected in the Estonian Biobank data (Table 2).

## 403 **Acknowledgments**

404 This research is financially supported by EU H2020 grant 692145, the European Regional  
405 Development Fund, Center of Excellence in Genomics GENTRANSMED (Project No. 2014-  
406 2020.4.01.15-0012), the Estonian Research Council Grants PUTJD817, IUT20-60, OUT1665P. We  
407 would like to acknowledge the International SISu Project for sharing the Finnish anonymised  
408 imputation reference panel data. We would like to acknowledge the High Performance Computing  
409 Center of the University of Tartu. PP and KP were supported by the NIASC - Nordic Information for  
410 Action eScience Center (a Nordic Center of Excellence; financed by NordForsk; Project No. 62721)  
411 grant to AP and SR. We would like to thank William Rayner for providing necessary files for  
412 genotype data preparation in his website. We would like to thank the UK Biobank for sharing the data  
413 (application No. 17085).

## References

1. Buniello A, MacArthur JAL, Cerezo M, Harris LW, Hayhurst J, Malangone C, et al. The NHGRI-EBI GWAS Catalog of published genome-wide association studies, targeted arrays and summary statistics 2019. *Nucleic Acids Res. Oxford University Press*; 2019;47: D1005–D1012. doi:10.1093/nar/gky1120
2. Li Y, Willer C, Sanna S, Abecasis G. Genotype Imputation. *Annu Rev Genomics Hum Genet.* 2009;10: 387–406. doi:10.1146/annurev.genom.9.081307.164242
3. Marchini J, Howie B, Myers S, McVean G, Donnelly P. A new multipoint method for genome-wide association studies by imputation of genotypes. *Nat Genet. Nature Publishing Group*; 2007;39: 906–913. doi:10.1038/ng2088
4. Marchini J, Howie B. Genotype imputation for genome-wide association studies. *Nat Rev Genet. Nature Publishing Group*; 2010;11: 499–511. doi:10.1038/nrg2796
5. Liu JZ, Tozzi F, Waterworth DM, Pillai SG, Muglia P, Middleton L, et al. Meta-analysis and imputation refines the association of 15q25 with smoking quantity. *Nat Genet. Nature Publishing Group*; 2010;42: 436–440. doi:10.1038/ng.572
6. The 1000 Genomes Project Consortium. A global reference for human genetic variation. *Nature. Nature Publishing Group*; 2015;526: 68–74. doi:10.1038/nature15393
7. McCarthy S, Das S, Kretzschmar W, Delaneau O, Wood AR, Teumer A, et al. A reference panel of 64,976 haplotypes for genotype imputation. *Nat Genet. Nature Publishing Group*; 2016;48: 1279–1283. doi:10.1038/ng.3643
8. Saunders EJ, Dadaev T, Leongamornlert DA, Jugurnauth-Little S, Tymrakiewicz M, Wiklund F, et al. Fine-Mapping the HOXB Region Detects Common Variants Tagging a Rare Coding Allele: Evidence for Synthetic Association in Prostate Cancer. Gibson G, editor. *PLoS Genet. Public Library of Science*; 2014;10: e1004129. doi:10.1371/journal.pgen.1004129
9. Eichler EE, Flint J, Gibson G, Kong A, Leal SM, Moore JH, et al. Missing heritability and strategies for finding the underlying causes of complex disease. *Nat Rev Genet. Nature Publishing Group*; 2010;11: 446–450. doi:10.1038/nrg2809

10. Mitt M, Kals M, Pärn K, Gabriel SB, Lander ES, Palotie A, et al. Improved imputation accuracy of rare and low-frequency variants using population-specific high-coverage WGS-based imputation reference panel. *Eur J Hum Genet.* Nature Publishing Group; 2017;25: 869–876. doi:10.1038/ejhg.2017.51
11. Pistis G, Porcu E, Vrieze SI, Sidore C, Steri M, Danjou F, et al. Rare variant genotype imputation with thousands of study-specific whole-genome sequences: implications for cost-effective study designs. *Eur J Hum Genet.* Macmillan Publishers Limited; 2015;23: 975–983. doi:10.1038/ejhg.2014.216
12. Gudbjartsson DF, Helgason H, Gudjonsson SA, Zink F, Oddson A, Gylfason A, et al. Large-scale whole-genome sequencing of the Icelandic population. *Nat Genet.* Nature Publishing Group; 2015;47: 435–444. doi:10.1038/ng.3247
13. Deelen P, Menelaou A, Van Leeuwen EM, Kanterakis A, Van Dijk F, Medina-Gomez C, et al. Improved imputation quality of low-frequency and rare variants in European samples using the “Genome of the Netherlands.” *Eur J Hum Genet.* 2014;22: 1321–1326. doi:10.1038/ejhg.2014.19
14. Huang J, Howie B, McCarthy S, Memari Y, Walter K, Min JL, et al. Improved imputation of low-frequency and rare variants using the UK10K haplotype reference panel. *Nat Commun.* 2015;6. doi:10.1038/ncomms9111
15. Sidore C, Busonero F, Maschio A, Porcu E, Naitza S, Zoledziewska M, et al. Genome sequencing elucidates Sardinian genetic architecture and augments association analyses for lipid and blood inflammatory markers. *Nat Genet.* 2015;47: 1272–1281. doi:10.1038/ng.3368
16. Zhou W, Fritsche LG, Das S, Zhang H, Nielsen JB, Holmen OL, et al. Improving power of association tests using multiple sets of imputed genotypes from distributed reference panels. *Genet Epidemiol.* 2017;41: 744–755. doi:10.1002/gepi.22067
17. Lin Y, Liu L, Yang S, Li Y, Lin D, Zhang X, et al. Genotype imputation for Han Chinese population using Haplotype Reference Consortium as reference. *Hum Genet.* 2018;137: 431–436. doi:10.1007/s00439-018-1894-z
18. Holm H, Gudbjartsson DF, Sulem P, Masson G, Helgadóttir HT, Zanon C, et al. A rare variant



- in MYH6 is associated with high risk of sick sinus syndrome. *Nat Genet.* 2011;43: 316–323.  
doi:10.1038/ng.781
19. Nioi P, Sigurdsson A, Thorleifsson G, Helgason H, Agustsdottir AB, Norrdahl GL, et al. Variant *ASGR1* Associated with a Reduced Risk of Coronary Artery Disease. *N Engl J Med.* 2016;374: 2131–2141. doi:10.1056/NEJMoa1508419
  20. Jonsson T, Stefansson H, Steinberg S, Jonsdottir I, Jonsson P V., Snaedal J, et al. Variant of *TREM2* Associated with the Risk of Alzheimer’s Disease. *N Engl J Med.* Massachusetts Medical Society ; 2013;368: 107–116. doi:10.1056/NEJMoa1211103
  21. Helgason H, Sulem P, Duvvari MR, Luo H, Thorleifsson G, Stefansson H, et al. A rare nonsynonymous sequence variant in C3 is associated with high risk of age-related macular degeneration. *Nature Genetics.* 2013. pp. 1371–1376. doi:10.1038/ng.2740
  22. Steinhorsdottir V, Thorleifsson G, Sulem P, Helgason H, Grarup N, Sigurdsson A, et al. Identification of low-frequency and rare sequence variants associated with elevated or reduced risk of type 2 diabetes. *Nat Genet.* 2014;46: 294–298. doi:10.1038/ng.2882
  23. Styrkarsdottir U, Thorleifsson G, Sulem P, Gudbjartsson DF, Sigurdsson A, Jonasdottir A, et al. Nonsense mutation in the LGR4 gene is associated with several human diseases and other traits. *Nature.* 2013;497: 517–520. doi:10.1038/nature12124
  24. Walter K, Min JL, Huang J, Crooks L, Memari Y, McCarthy S, et al. The UK10K project identifies rare variants in health and disease. *Nature.* 2015;526: 82–89. doi:10.1038/nature14962
  25. Timpson NJ, Walter K, Min JL, Tachmazidou I, Malerba G, Shin SY, et al. A rare variant in APOC3 is associated with plasma triglyceride and VLDL levels in Europeans. *Nat Commun.* 2014;5. doi:10.1038/ncomms5871
  26. Moutsianas L, Agarwala V, Fuchsberger C, Flannick J, Rivas MA, Gaulton KJ, et al. The Power of Gene-Based Rare Variant Methods to Detect Disease-Associated Variation and Test Hypotheses About Complex Disease. *PLoS Genet.* 2015;11. doi:10.1371/journal.pgen.1005165
  27. Lee S, Emond MJ, Bamshad MJ, Barnes KC, Rieder MJ, Nickerson DA, et al. Optimal unified approach for rare-variant association testing with application to small-sample case-control



- whole-exome sequencing studies. *Am J Hum Genet.* 2012;91: 224–237.  
doi:10.1016/j.ajhg.2012.06.007
28. Li B, Leal SM. Methods for Detecting Associations with Rare Variants for Common Diseases: Application to Analysis of Sequence Data. *Am J Hum Genet.* 2008;83: 311–321.  
doi:10.1016/j.ajhg.2008.06.024
29. Morris AP, Zeggini E. An evaluation of statistical approaches to rare variant analysis in genetic association studies. *Genet Epidemiol.* 2010;34: 188–193. doi:10.1002/gepi.20450
30. Bomba L, Walter K, Soranzo N. The impact of rare and low-frequency genetic variants in common disease. *Genome Biol. BioMed Central;* 2017;18: 77. doi:10.1186/s13059-017-1212-4
31. Singh T, Kurki MI, Curtis D, Purcell SM, Crooks L, McRae J, et al. Rare loss-of-function variants in SETD1A are associated with schizophrenia and developmental disorders. *Nat Neurosci.* 2016;19: 571–577. doi:10.1038/nn.4267
32. Do R, Stitzel NO, Won HH, Jørgensen AB, Duga S, Merlini PA, et al. Exome sequencing identifies rare LDLR and APOA5 alleles conferring risk for myocardial infarction. *Nature.* 2015;518: 102–106. doi:10.1038/nature13917
33. Ganna A, Satterstrom FK, Zekavat SM, Das I, Kurki MI, Churchhouse C, et al. Quantifying the Impact of Rare and Ultra-rare Coding Variation across the Phenotypic Spectrum. *Am J Hum Genet.* 2018;102: 1204–1211. doi:10.1016/j.ajhg.2018.05.002
34. Purcell SM, Moran JL, Fromer M, Ruderfer D, Solovieff N, Roussos P, et al. A polygenic burden of rare disruptive mutations in schizophrenia. *Nature.* 2014;506: 185–190.  
doi:10.1038/nature12975
35. Fritsche LG, Igl W, Bailey JNC, Grassmann F, Sengupta S, Bragg-Gresham JL, et al. A large genome-wide association study of age-related macular degeneration highlights contributions of rare and common variants. *Nat Genet.* 2016;48: 134–143. doi:10.1038/ng.3448
36. Teslovich TM, Kim DS, Yin X, Stančáková A, Jackson AU, Wielscher M, et al. Identification of seven novel loci associated with amino acid levels using single-variant and gene-based tests in 8545 Finnish men from the METSIM study. *Hum Mol Genet.* 2018;27: 1664–1674.  
doi:10.1093/hmg/ddy067

37. Wessel J, Chu AY, Willems SM, Wang S, Yaghootkar H, Brody JA, et al. Low-frequency and rare exome chip variants associate with fasting glucose and type 2 diabetes susceptibility. *Nat Commun.* Nature Publishing Group; 2015;6: 5897. doi:10.1038/ncomms6897
38. Burton PR, Clayton DG, Cardon LR, Craddock N, Deloukas P, Duncanson A, et al. Genome-wide association study of 14,000 cases of seven common diseases and 3,000 shared controls. *Nature.* 2007;447: 661–678. doi:10.1038/nature05911
39. UK Biobank Phasing and Imputation Documentation. 2015. Available from: [http://www.ukbiobank.ac.uk/wp-content/uploads/2014/04/imputation\\_documentation\\_May2015.pdf](http://www.ukbiobank.ac.uk/wp-content/uploads/2014/04/imputation_documentation_May2015.pdf). Cited 10 September 2018.
40. UK Biobank Genotyping and Imputation Data Release. 2018. Available from: <http://www.ukbiobank.ac.uk/wp-content/uploads/2018/03/UKB-Genotyping-and-Imputation-Data-Release-FAQ-v3-2.pdf>. Cited 10 September 2018.
41. Neale lab. Updated (second) round of GWAS results of the UK Biobank. 2018; Available from: <http://www.nealelab.is/uk-biobank/ukbround2announcement>. Cited 10 September 2018.
42. Smyth DJ, Plagnol V, Walker NM, Cooper JD, Downes K, Yang JHM, et al. Shared and distinct genetic variants in type 1 diabetes and celiac disease. *N Engl J Med.* Massachusetts Medical Society; 2008;359: 2767–2777. doi:10.1056/NEJMoa0807917
43. Lek M, Karczewski KJ, Minikel EV, Samocha KE, Banks E, Fennell T, et al. Analysis of protein-coding genetic variation in 60,706 humans. *Nature.* Nature Publishing Group; 2016;536: 285–291. doi:10.1038/nature19057
44. Leitsalu L, Haller T, Esko T, Tammesoo ML, Alavere H, Snieder H, et al. Cohort Profile: Estonian Biobank of the Estonian Genome Center, University of Tartu. *Int J Epidemiol.* 2015;44: 1137–1147. doi:10.1093/ije/dyt268
45. Borodulin K, Tolonen H, Jousilahti P, Jula A, Juolevi A, Koskinen S, et al. Cohort Profile: The National FINRISK Study. *Int J Epidemiol.* 2017;47: 696–696i. doi:10.1093/ije/dyx239
46. Borodulin K, Vartiainen E, Peltonen M, Jousilahti P, Juolevi A, Laatikainen T, et al. Forty-year trends in cardiovascular risk factors in Finland. *Eur J Public Health.* 2015;25: 539–546. doi:10.1093/eurpub/cku174

47. Mähönen M, Jula A, Harald K, Antikainen R, Tuomilehto J, Zeller T, et al. The validity of heart failure diagnoses obtained from administrative registers. *Eur J Prev Cardiol*. SAGE PublicationsSage UK: London, England; 2013;20: 254–259. doi:10.1177/2047487312438979
48. Sund R. Quality of the Finnish Hospital Discharge Register: a systematic review. *Scand J Public Health*. SAGE PublicationsSage UK: London, England; 2012;40: 505–515. doi:10.1177/1403494812456637
49. Pajunen P, Koukkunen H, Ketonen M, Jerkkola T, Immonen-Raiha P, Karja-Koskenkari P, et al. The validity of the Finnish Hospital Discharge Register and Causes of Death Register data on coronary heart disease. *Eur J Cardiovasc Prev Rehabil*. SAGE PublicationsSage UK: London, England; 2005;12: 132–137. doi:10.1097/01.hjr.0000140718.09768.ab
50. Tolonen H, Salomaa V, Torppa J, Sivenius J, Immonen-Räihä P, Lehtonen A, et al. The validation of the Finnish Hospital Discharge Register and Causes of Death Register data on stroke diagnoses. *Eur J Cardiovasc Prev Rehabil*. SAGE PublicationsSage UK: London, England; 2007;14: 380–385. doi:10.1097/01.hjr.0000239466.26132.f2
51. Headache Classification Committee of the International Headache Society (IHS). The International Classification of Headache Disorders, 3rd edition (beta version). *Cephalalgia*. 2013;33: 629–808. doi:10.1177/0333102413485658
52. Eskelinen S, Sailas E, Joutsenniemi K, Holi M, Suvisaari J. Clozapine use and sedentary lifestyle as determinants of metabolic syndrome in outpatients with schizophrenia. *Nord J Psychiatry*. 2015;69: 339–345. doi:10.3109/08039488.2014.983544
53. Eskelinen S, Sailas E, Joutsenniemi K, Holi M, Koskela TH, Suvisaari J. Multiple physical healthcare needs among outpatients with schizophrenia: findings from a health examination study. *Nord J Psychiatry*. 2017;71: 448–454. doi:10.1080/08039488.2017.1319497
54. Aromaa A, Koskinen S, editors. Health and functional capacity in Finland. Baseline results of the Health 2000 health examination survey. Publications of the National Public Health Institute: Helsinki, Finland; 2004. Available from: <http://urn.fi/URN:NBN:fi-fe201204193452>. Cited 10 September 2018.
55. Li H, Durbin R. Fast and accurate long-read alignment with Burrows-Wheeler transform.

- Bioinformatics. 2010;26: 589–595. doi:10.1093/bioinformatics/btp698
56. McKenna A, Hanna M, Banks E, Sivachenko A, Cibulskis K, Kernytsky A, et al. The Genome Analysis Toolkit: A MapReduce framework for analyzing next-generation DNA sequencing data. *Genome Res.* 2010;20: 1297–1303. doi:10.1101/gr.107524.110
  57. Van der Auwera GA, Carneiro MO, Hartl C, Poplin R, del Angel G, Levy-Moonshine A, et al. From FastQ Data to High-Confidence Variant Calls: The Genome Analysis Toolkit Best Practices Pipeline. *Current Protocols in Bioinformatics*. Hoboken, NJ, USA: John Wiley & Sons, Inc.; 2013. p. 11.10.1-11.10.33. doi:10.1002/0471250953.bi1110s43
  58. Li H, Wren J. Toward better understanding of artifacts in variant calling from high-coverage samples. *Bioinformatics*. 2014. pp. 2843–2851. doi:10.1093/bioinformatics/btu356
  59. Purcell S, Neale B, Todd-Brown K, Thomas L, Ferreira MAR, Bender D, et al. PLINK: A Tool Set for Whole-Genome Association and Population-Based Linkage Analyses. *Am J Hum Genet.* 2007;81: 559–575. doi:10.1086/519795
  60. Loh P-R, Palamara PF, Price AL. Fast and accurate long-range phasing in a UK Biobank cohort. *Nat Genet.* Nature Publishing Group; 2016;48: 811–816. doi:10.1038/ng.3571
  61. Loh P-R, Danecek P, Palamara PF, Fuchsberger C, A Reshef Y, K Finucane H, et al. Reference-based phasing using the Haplotype Reference Consortium panel. *Nat Genet.* Nature Publishing Group; 2016;48: 1443–1448. doi:10.1038/ng.3679
  62. Browning BL, Browning SR. A unified approach to genotype imputation and haplotype-phase inference for large data sets of trios and unrelated individuals. *Am J Hum Genet.* 2008;84: 210–223. doi:10.1016/j.ajhg.2009.01.005
  63. Firth D. Bias reduction of maximum likelihood estimates. *Biometrika.* 1993;80: 27–38. doi:10.1093/biomet/80.1.27
  64. Pruim RJ, Welch RP, Sanna S, Teslovich TM, Chines PS, Gliedt TP, et al. LocusZoom: regional visualization of genome-wide association scan results. *Bioinformatics.* 2011. pp. 2336–2337. doi:10.1093/bioinformatics/btq419
  65. Benner C, Spencer CCA, Havulinna AS, Salomaa V, Ripatti S, Pirinen M. FINEMAP: efficient variable selection using summary data from genome-wide association studies. *Bioinformatics.*

2016;32: 1493–1501. doi:10.1093/bioinformatics/btw018

66. Harrow J, Frankish A, Gonzalez JM, Tapanari E, Diekhans M, Kokocinski F, et al. GENCODE: the reference human genome annotation for the ENCODE project. *Genome Res.* 2012;22: 1760–1774. doi:10.1101/gr.135350.111
67. Sudlow C, Gallacher J, Allen N, Beral V, Burton P, Danesh J, et al. UK Biobank: An Open Access Resource for Identifying the Causes of a Wide Range of Complex Diseases of Middle and Old Age. *PLoS Med.* 2015;12. doi:10.1371/journal.pmed.1001779

## Supporting information

**S1 Fig. Number of confidently imputed variants.** Venn diagrams of confidently imputed variants (INFO > 0.8) using EstFin (blue) and 1000G (orange) IRPs in four minor allele frequency categories.

A)  $0.05\% < \text{MAF} \leq 0.5\%$ , B)  $0.5\% < \text{MAF} \leq 1\%$ , C)  $1\% < \text{MAF} \leq 5\%$ , D)  $\text{MAF} > 5\%$ .

**S2 Fig. Distributions of imputation INFO-values.** Distribution of imputation INFO-values for the EstFin and the 1000G IRPs imputed data measured on chromosome 20 in four minor allele frequency categories. A) EstFin IRP, B) 1000G IRP.

**S3 Fig. Genome-wide association analysis results of eight common traits.** The top panel of Miami plot shows the single variant association analysis results using the EstFin-based imputed data, while the bottom part shows GWAS results for the 1000G IRP imputed data. Red dots denote significant regions and the genome-wide significance threshold after correction for multiple testing ( $P < 6.25 \times 10^{-9}$ ) is indicated by a red dashed line. A) body mass index, B) bipolar disorder, C) Crohn's disease, D) hypertension, E) coronary artery disease, F) rheumatoid arthritis, G) type 1 diabetes, H) type 2 diabetes.

**S4 Fig. Significant regions from single variant association analysis.** Regional plots show all significant genomic regions from the single variant analysis. The left panel indicates results for the EstFin-based imputed data, while the right panel shows results for the 1000G IRP imputed data. The purple symbol represents the lead variant, and the rest of the colour-coded variants denote LD with the lead variant estimated by  $r^2$  from the 1000G phase 3 (EUR population) data.

\* 1000G-based imputed data shows a single variant significantly association with HT at 2q22.1, which most likely represents a false-positive finding.

**S5 Fig. Gene-based association analysis results of common traits.** The top panel of Miami plot shows the gene-based association analysis results using the EstFin-based imputed data, while the

bottom part shows results for the 1000G IRP imputed data. Blue dots represent tested genes including NS variants and orange asterisks LoF variants. Dashed lines indicate significance levels after correction for multiple testing:  $P < 4.83 \times 10^{-7}$  for NS variants (blue) and  $P < 9.40 \times 10^{-6}$  for LoF variants (orange). Red symbols denote significant genes. A) body mass index, B) Crohn's disease, C) hypertension, D) coronary artery disease, E) rheumatoid arthritis, F) type 1 diabetes, G) type 2 diabetes.

**S6 Fig. Quantile-quantile plots for single variant association analysis.** Quantile-quantile plots of the GWAS  $P$  values based on the EstFin (left panel, blue dots) and the 1000G (right panel, purple dots) IRPs imputed data. Region in gray dashed lines is the 95% confidence band. A) body mass index, B) bipolar disorder, C) Crohn's disease, D) coronary artery disease, E) hypertension, F) rheumatoid arthritis, G) type 1 diabetes, H) type 2 diabetes.

**S1 Table. Number of imputed variants.** Number of overall, well-imputed (INFO > 0.4) and confidently imputed (INFO > 0.8) variants with the EstFin and the 1000G IRPs. The last column indicates confidently imputed variants common for both IRP-based imputations.

**S2 Table. An overview of seven complex diseases.** ICD-10 diagnosis codes, number of cases and controls for seven complex diseases in 36,716 Estonian Biobank individuals used in the association analysis.

**S3 Table. Previously known associations for significant single variant analysis results.** Relevant genome-wide associations from the GWAS Catalog for significant genomic regions (around genes ( $\pm$  50 kb) with the lowest  $P$  value) detected by variant-wise analysis. Gray background refers to direct relationship between studied trait and GWAS Catalog entry.

**S4 Table. Summary statistics of lead variants at significant loci identified in single variant GWAS results.** Confidently imputed variants (INFO > 0.8) are tested for associations with complex traits

(BMI – body mass index, CAD – coronary artery disease, RA – rheumatoid arthritis, T1D – type 1 diabetes, T2D – type 2 diabetes). Analyses are conducted separately for the EstFin and the 1000G IRP-based imputed datasets. Multiple testing corrected significance level ( $P < 6.25 \times 10^{-9}$ ) is used. For each significant loci, lead variant with single variant GWAS summary statistics are provided.

**S5 Table. Overview of genetic variants involved in significant gene-trait associations.** A list of all single variants involved in significant gene-wise associations with single variant GWAS summary statistics. In the last column, relevant references are provided, where particular gene-trait association is previously identified.

**S6 Table. Previously known associations for significant gene-based analysis results.** Relevant genome-wide associations from the GWAS Catalog for significant genes ( $\pm 50$  kb) detected by gene-wise analysis. Gray background refers to direct relationship between studied trait and GWAS Catalog entry.

**S1 Appendix. Overview of genotype imputation and examples of disease associated genes.** A detailed overview of genotype imputation with the EstFin and the 1000G IRPs are provided. Five examples of significant gene-trait associations from the EstFin-based imputation results with potential underlying biological mechanisms are considered in more details.
